# Supplementary material
Source: publisher figshare collection journal article supplement (https://acs.figshare.com/ndownloader/files/4314742)

## Supporting Information

### Structure and Physical Properties of Two- and Three-Dimensional Divalent Metal Adipate Coordination Polymers with Bis(4-pyridylmethyl)piperazine Tethers

Arash Banisafar, David P. Martin, Jacqueline S. Lucas, Robert L. LaDuca\*

Figure S1. Stacking of layers in  $\{[\text{Cd}(\text{adipate})(\text{H}_2\text{bpmp})(\text{H}_2\text{O})]\text{SO}_4 \cdot 4\text{H}_2\text{O}\}_n$  (**1**).

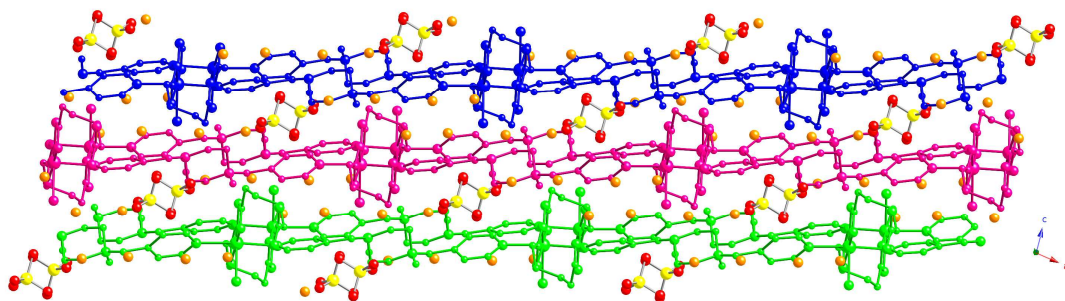

Figure S2. Stacking of  $[\text{Cu}(\text{adipate})(\text{Hbpmp})]_n^{n+}$  cationic coordination polymer slabs in **3**. Unligated perchlorate ions and water molecules of crystallization are also shown.

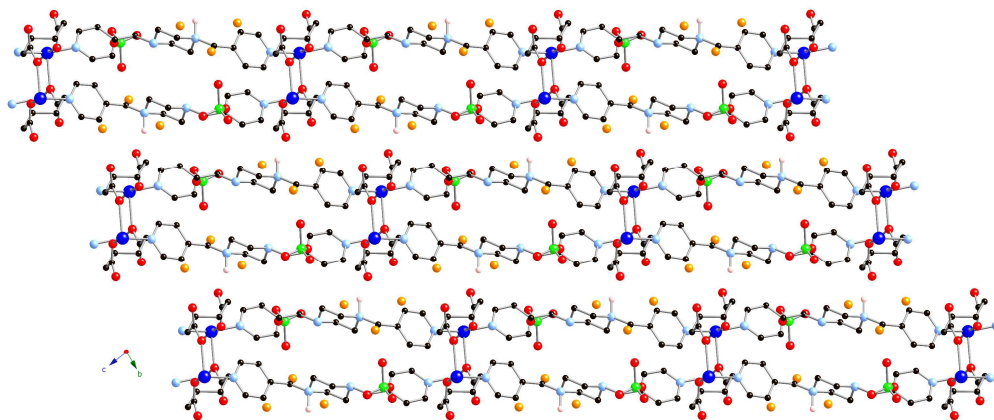

Supplement: Supplementary file 1 [file 4314742]
